# Supplementary material
Source: Elsevier journal article supplement (https://www.sciencedirect.com/science/article/pii/S1679007315000031)
Supplement: mmc1 [file S1679007315000031:mmc1.docx]

**NCON 042-2014 – Suppl. tables**

**Table S1 - Factorial ANOVA statistics for deforestation in protected areas according to use (integral protection or sustainable use), expropriation (yes or no), and jurisdiction (Federal, State and Municipal).**

|  | Inside protected areas | | | | | 10 km buffer outside protected areas | | | | |
| --- | --- | --- | --- | --- | --- | --- | --- | --- | --- | --- |
|  | DF | SS | MS | *F* | P | DF | SS | MS | *F* | P |
| Use | 1 | 5.72 | 5.72 | 37.20 | < 0.001 | 1 | 0.01 | 0.01 | 0.06 | 0.800 |
| Jurisdiction | 2 | 2.77 | 1.38 | 8.99 | < 0.001 | 2 | 1.21 | 0.60 | 5.90 | 0.003 |
| Expropriation | 1 | 0.26 | 0.26 | 1.71 | 0.193 | 1 | 1.15 | 1.15 | 11.27 | < 0.001 |
| Use: Jurisdiction | 2 | 0.90 | 0.45 | 2.92 | 0.056 | 2 | 1.46 | 0.73 | 7.14 | < 0.001 |
| Use: Expropriation | 1 | 0.27 | 0.27 | 1.78 | 0.183 | 1 | 0.05 | 0.05 | 0.46 | 0.500 |
| Jurisdiction: Expropriation | 2 | 1.52 | 0.76 | 4.95 | 0.008 | 2 | 0.49 | 0.25 | 2.41 | 0.092 |
| Use: Jurisdiction: Expropriation | 1 | 0.30 | 0.30 | 1.93 | 0.166 | 1 | 0.00 | 0.00 | 0.01 | 0.933 |
| Residuals | 274 | 42.16 | 0.15 |  |  | 274 | 28.07 | 0.10 |  |  |

**Table S2 - Significative results of Tukey test for the significance differences in ANOVA statistics for deforestation inside protected areas and in the 10 km buffer outside of the protected areas.**

| **Inside protected areas** | **P adj** | **Buffer 10 km outside protected areas** | **P adj** |
| --- | --- | --- | --- |
| Jurisdiction |  | Jurisdiction |  |
| Federal-State | 0.004 | Federal-State | 0.006 |
| Federal - Municipal | <0.001 | Federal - Municipal | 0.004 |
| Jurisdiction:Expropriation interaction |  | Use:Jurisdiction interaction |  |
| Federal:Expropriation-State:Expropriation | <0.001 | PI:Federal-PI:State | <0.001 |
| Federal:Expropriation Municipal:Expropriation- | 0.013 | PI:Federal - PI:Municipal | <0.001 |
| Federal:Expropriation Municipal:n.Expropriation- | <0.001 | PI:Federal - SU:Federal | 0.033 |
|  |  | PI:Federal-SU:State | 0.002 |
|  |  | PI:Federal - SU:Municipal | 0.008 |

**Table S3 - Comparison between deforestation inside and outside different categories of protected areas in the Cerrado biome.**

| Jurisdiction | Use | Category | N | Mean deforested area inside (%) | Mean deforested area outside (%) | *W* | *P* | *P adjusted* |
| --- | --- | --- | --- | --- | --- | --- | --- | --- |
| Federal | IP | EEa | 5 | 1.4 ± 0.8 | 19.0 ± 11.4 | 0 | 0.008 | 0.104 |
| PARKa | 15 | 3.7 ± 4.7 | 30.8 ± 22.0 | 17 | < 0.001 | 0.017 |
| REBIOa | 1 | 16.5 ± 0.0 | 53.9 ± 0.0 | - | - | - |
| RVS | 1 | 3.3 ± 0.0 | 28.9 ± 0.0 | - | - | - |
| SU | FLONAa | 7 | 34.6 ± 38.7 | 62.6 ± 28.5 | 9 | 0.202 | 1 |
| APA | 11 | 41.6 ± 29.5 | 41.7 ± 21.4 | 57 | 0.847 | 1 |
| ARIE | 3 | 57.8 ± 41.2 | 92.5 ± 2.4 | 3 | 0.700 | 1 |
| RESEX | 6 | 25.1 ± 27.1 | 54.2 ± 28.6 | 8 | 0.132 | 1 |
| State | IP | EEa | 25 | 35.7 ± 38.9 | 77.5 ± 21.1 | 141 | < 0.001 | 0.017 |
| PARKa | 43 | 18.5 ± 26.3 | 52.7 ± 29.2 | 299 | < 0.001 | 0.017 |
| REBIOa | 4 | 56.4 ± 22.8 | 84.3 ± 10.3 | 2 | 0.114 | 1 |
| MN | 4 | 18.6 ± 18.9 | 40.2 ± 19.3 | 2 | 0.114 | 1 |
| RVS | 5 | 25.2 ± 14.5 | 41.0 ± 33.0 | 11 | 0.841 | 1 |
| SU | FLONAa | 10 | 81.6 ± 26.8 | 82.6 ± 20.6 | 61 | 0.426 | 1 |
| RDSa | 1 | 0.9 ± 0.0 | 18.6 ± 0.0 | - | - | - |
| APA | 56 | 39.2 ± 29.7 | 46.4 ± 30.6 | 1,357 | 0.221 | 1 |
| ARIE | 7 | 57.6 ± 27.3 | 95.0 ± 2.5 | 7 | 0.026 | 0.3 |
| Municipal | IP | PARKa | 16 | 39.0 ± 37.8 | 70.1 ± 19.1 | 68 | 0.025 | 0.3 |
| MN | 11 | 40.7 ± 21.5 | 70.1 ± 13.6 | 20 | 0.007 | 0.098 |
| SU | APA | 54 | 51.1 ± 28.6 | 55.9 ± 22.3 | 30 | 0.875 | 1 |

a Expropriation categories.
